# Supplementary material for: Acinetobacter baumannii Can Survive with an Outer Membrane Lacking Lipooligosaccharide Due to Structural Support from Elongasome Peptidoglycan Synthesis
Source: PubMed Central journal article supplement (PMC8630537; doi:10.1128/mbio.03099-21), 2021-11-30
Supplement: mbio.03099-21-sf001.pdf [file mbio.03099-21-sf001.pdf]

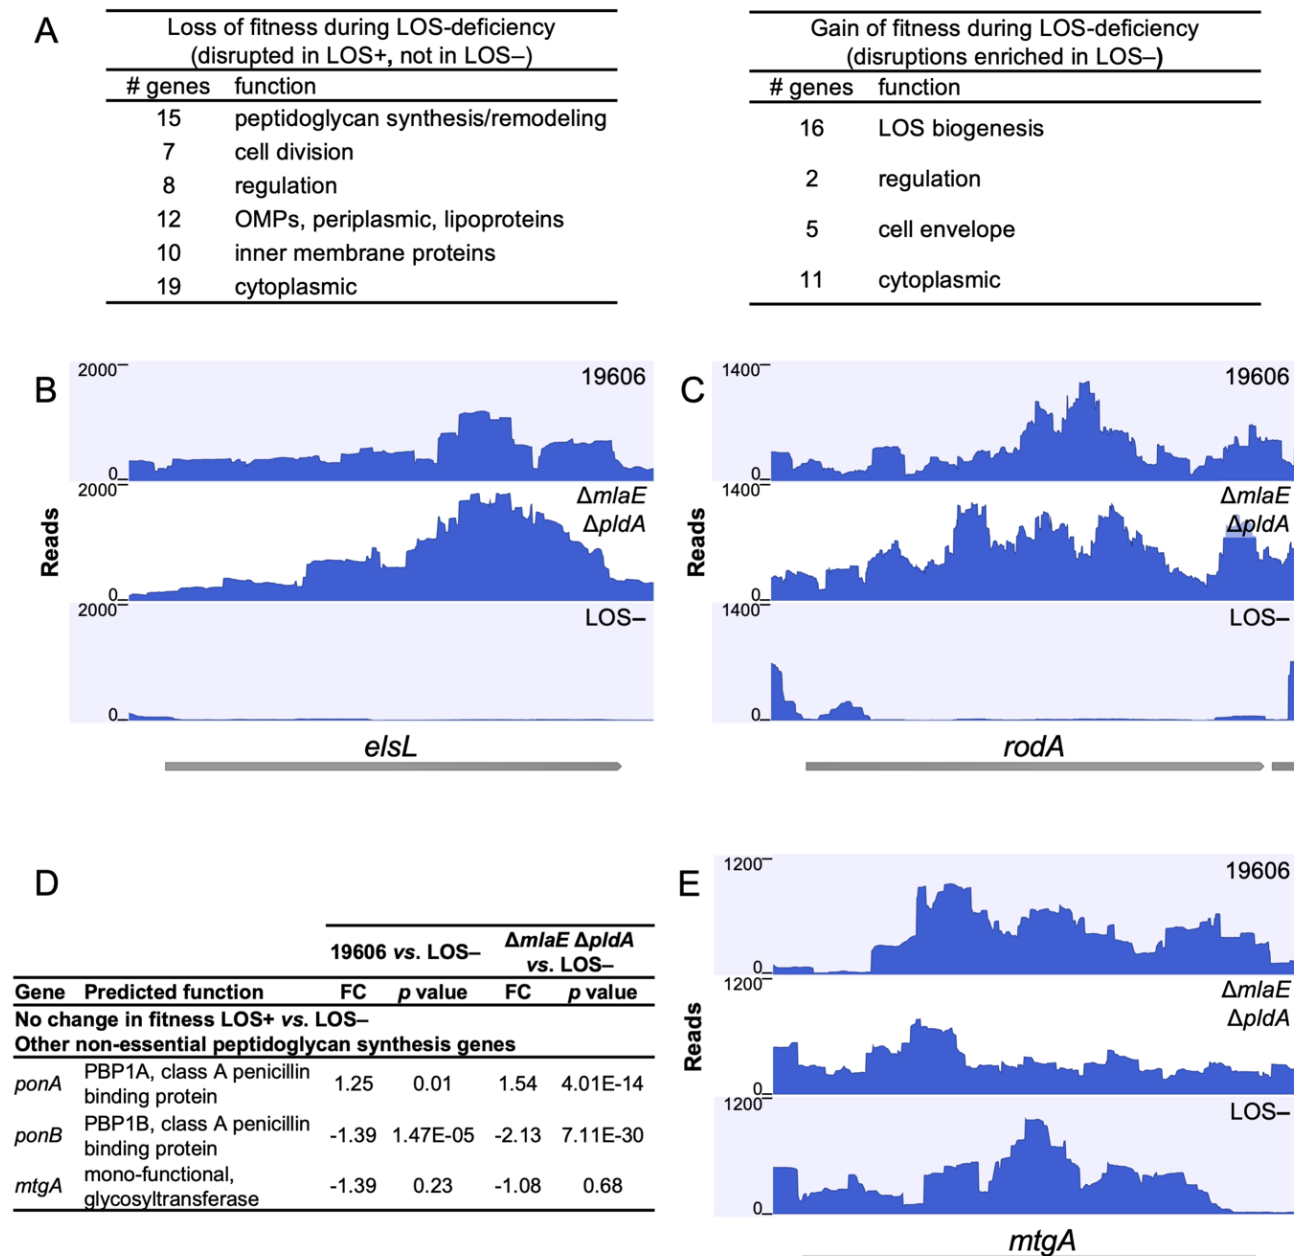

**Fig. S1. Tn-seq during LOS-deficiency.** A) Saturated Tn libraries were generated in an LOS-deficient strain and LOS-containing parent strains. Deep sequencing identified genes that when disrupted had a significant ( $\geq 5$ -fold) loss of fitness (left) or gain of fitness (right) during LOS-deficiency. Summary of gene categories for all hits. B-C) Graphical representation of read depth across representative genes with scale on left. Representative genes, *elsL* (B) and *rodA* (C), whose disruptions result in a significant loss of fitness in an LOS-deficient strain. Representative gene, *mtgA* (E), with no significant difference in Tn insertions in an LOS-deficient strain. D) non-essential peptidoglycan synthesis genes that had no change in fitness ( $< 5$  fold) between LOS-containing and LOS-deficient strains. FC indicates fold change.
