# Supplementary material for: Acinetobacter baumannii Can Survive with an Outer Membrane Lacking Lipooligosaccharide Due to Structural Support from Elongasome Peptidoglycan Synthesis
Source: PubMed Central journal article supplement (PMC8630537; doi:10.1128/mbio.03099-21), 2021-11-30
Supplement: mbio.03099-21-sf003.pdf [file mbio.03099-21-sf003.pdf]

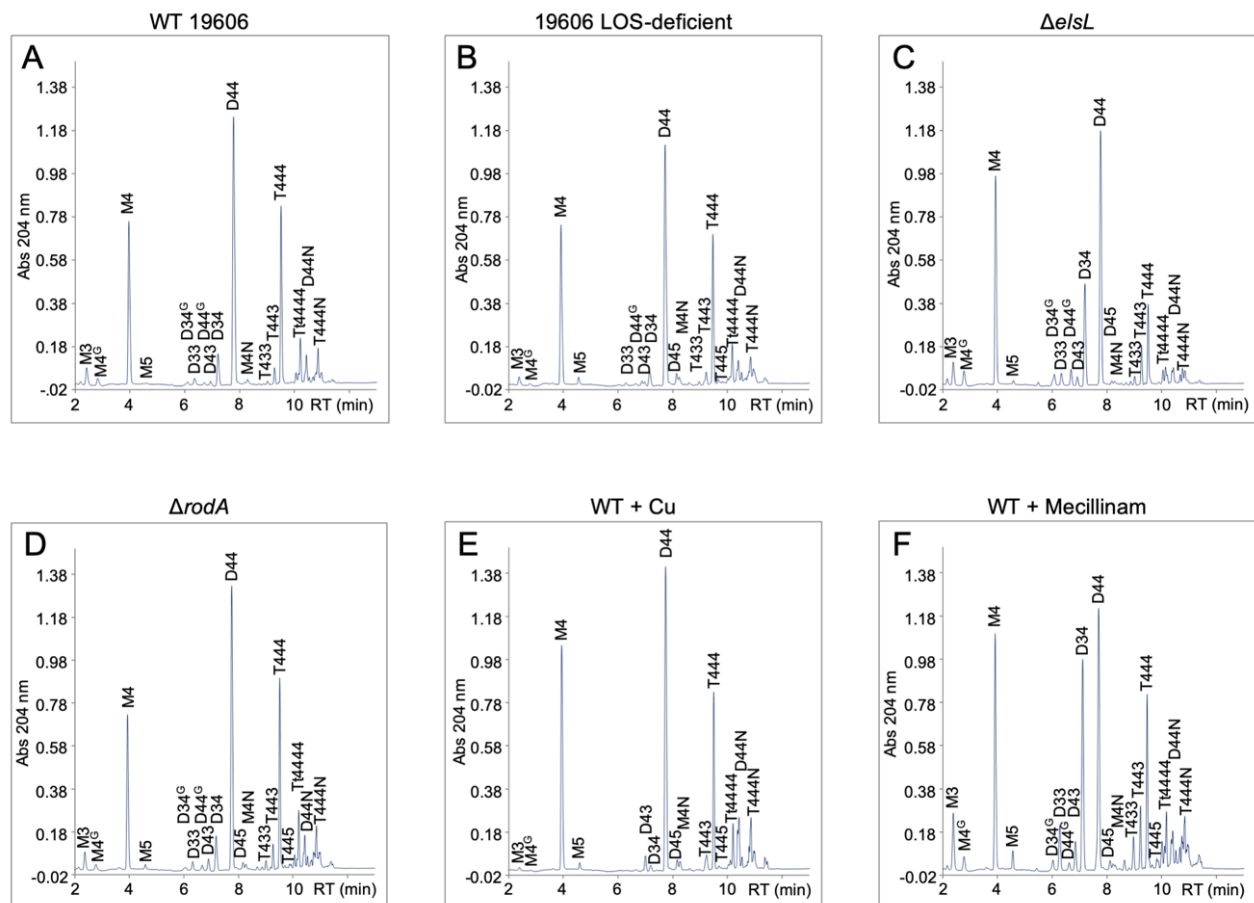

**Fig. S3. Muropeptide analysis of *A. baumannii* 19606 strains.** UPLC chromatograms of muropeptides from 19606 wild type (A), 19606 LOS-deficient (B), 19606  $\Delta elsL$  (C), and 19606  $\Delta rodA$  (D) grown to mid log in LB. UPLC of muropeptides from wild-type treated with 3.12 mM of copper(II) (E, abbreviated as Cu) or treated with 250  $\mu\text{g}/\text{mL}$  of mecillinam (F). Muropeptides are labelled: M3, monomer disaccharide tripeptide; M4<sup>G</sup>, monomer disaccharide tetrapeptide with Gly at fourth position; M4, monomer disaccharide tetrapeptide; M5, monomer disaccharide pentapeptide; D34<sup>G</sup>, dimer disaccharide tri-tetrapeptide with one Gly at fourth position; D33, dimer disaccharide tri-tripeptide; D44<sup>G</sup>, dimer disaccharide tetra-tetrapeptide with one Gly at fourth position; D43, dimer disaccharide tetra-tripeptide; D34, dimer disaccharide tri-tetrapeptide; D44, dimer disaccharide tetra-tetrapeptide; D45, dimer disaccharide tetra-pentapeptide; M4N, anhydrous monomer disaccharide tetrapeptide; T433, trimer disaccharide tetra-tri-tripeptide; T443, trimer disaccharide tetra-tetra-tripeptide; T444, trimer disaccharide tetra-tetra-tetrapeptide; T445, trimer disaccharide tetra-tetra-pentapeptide; Tt4444, tetramer disaccharide tetra-tetra-tetra-tetrapeptide; D44N, anhydrous dimer disaccharide tetra-tetrapeptide; T444N, anhydrous trimer disaccharide tetra-tetra-tetrapeptide.
